# Supplementary material
Source: Elsevier journal article supplement (https://www.sciencedirect.com/science/article/pii/S0870255119304986)
Supplement: mmc1 [file S0870255119304986:mmc1.docx]

**Table S1.** Participants’ characteristics (n=4911)

|  | **n** | **%** |
| --- | --- | --- |
| **Sex** |  |  |
| Male | 2265 | 47.5 |
| Female | 2646 | 52.5 |
| **Age group** |  |  |
| 25-44 years | 1849 | 37.6 |
| 45-54 years | 1193 | 24.3 |
| 55-64 years | 1098 | 22.4 |
| 65-74 years | 771 | 15.7 |
| **Marital status** |  |  |
| Not married1 | 1478 | 31.6 |
| Married/ Living as a couple | 3433 | 68.4 |
| **Urbanization of living area** |  |  |
| Rural | 1397 | 26.4 |
| Urban | 3514 | 73.6 |
| **Education (4 missings)** |  |  |
| None or 1st cycle of basic education | 1516 | 27.7 |
| 2nd or 3rd cycle of basic education | 1595 | 31.5 |
| Secondary education | 958 | 21.4 |
| Higher Education | 838 | 19.4 |
| **Occupation (3 missings)** |  |  |
| Employed | 2975 | 61.9 |
| Unemployed | 549 | 11.3 |
| Other2 | 1384 | 26.8 |

1 Not married: Single, Divorced, Separated and Widow. 2 Other: Student, Retired and Housewife.

**Table S2.** Non-participants’ characteristics (n=1575)

|  | **n** | **%** |
| --- | --- | --- |
| **Sex** |  |  |
| Male | 722 | 45.8 |
| Female | 853 | 54.2 |
| **Age group** |  |  |
| 25-44 years | 623 | 39.6 |
| 45-54 years | 333 | 21.1 |
| 55-64 years | 310 | 19.7 |
| 65-74 years | 309 | 19.6 |
| **Antihypertensive medication** |  |  |
| Yes | 394 | 26.0 |
| No | 1122 | 74.0 |
